# Supplementary material for: The EHD protein Past1 controls postsynaptic membrane elaboration and synaptic function
Source: PubMed Central journal article supplement — Mol Biol Cell. 2015 Sep 15;26(18):3275–88. doi: 10.1091/mbc.E15-02-0093 (PMC4569317; doi:10.1091/mbc.e15-02-0093), 2015-09-15
Supplement: supp_E15-02-0093v1_CombinedSupMats.pdf [file supp_E15-02-0093v1_CombinedSupMats.pdf]

# Supplemental Materials

*Molecular Biology of the Cell*

Koles et al.

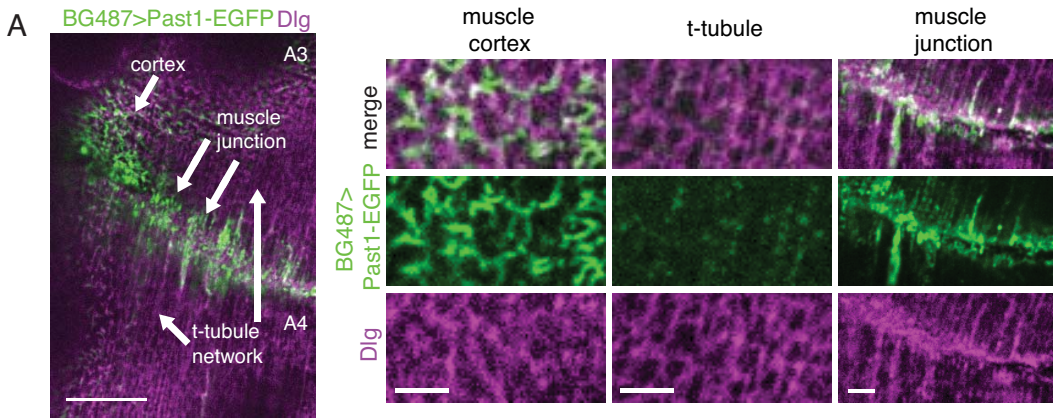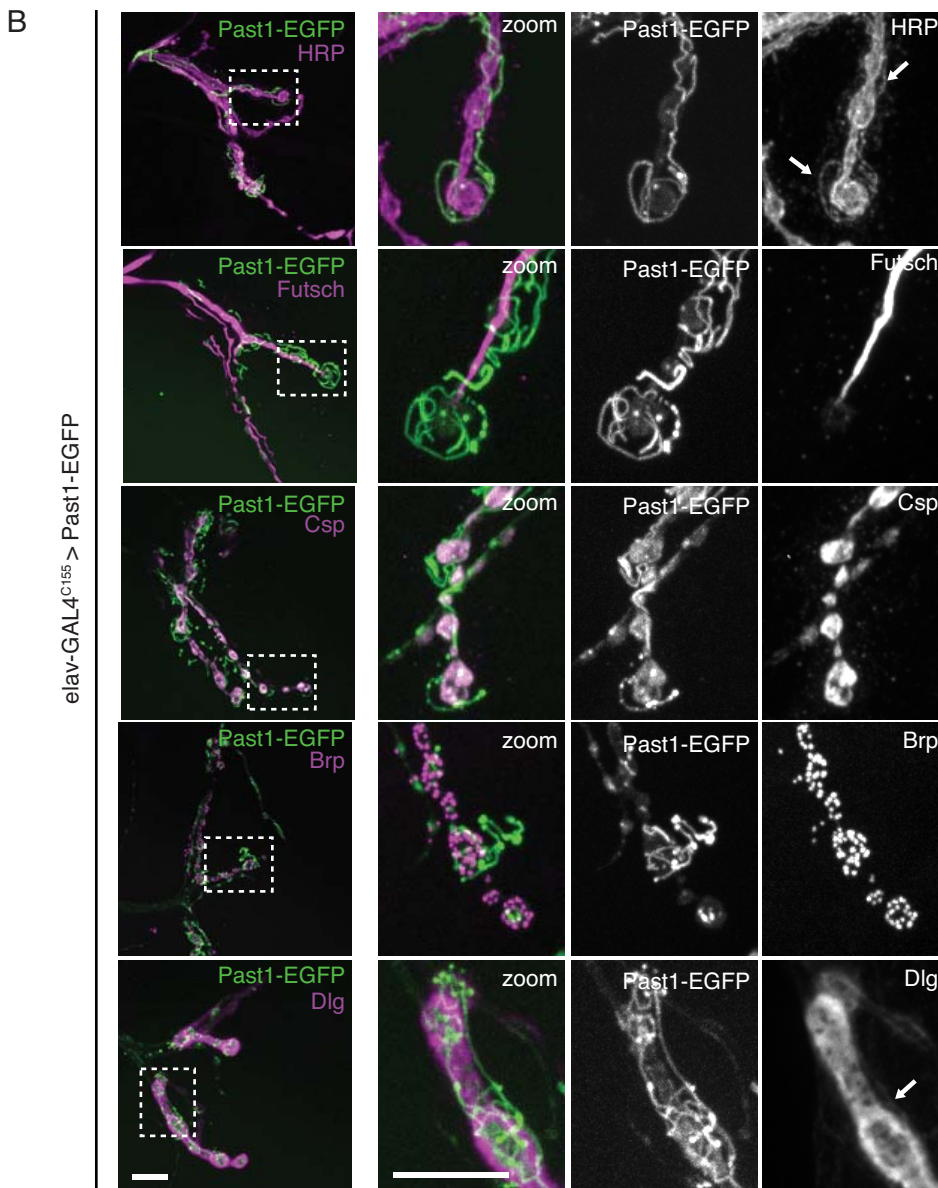

Koles et al. Figure S2

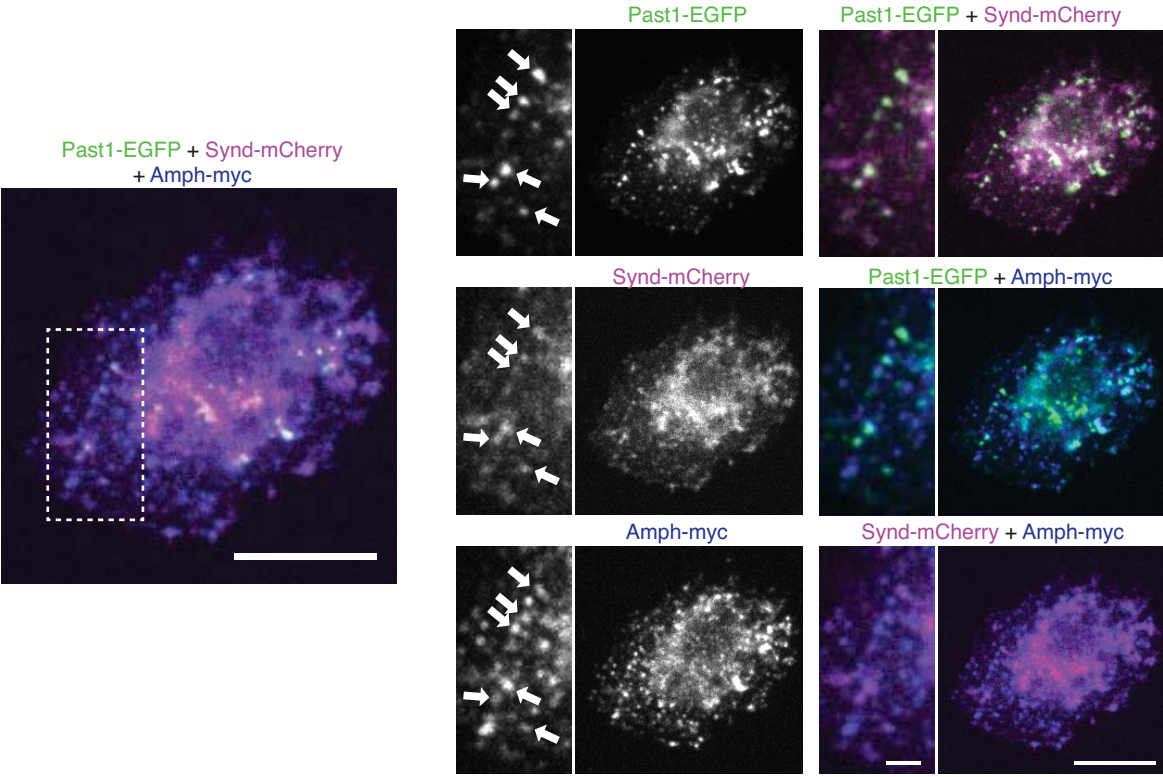

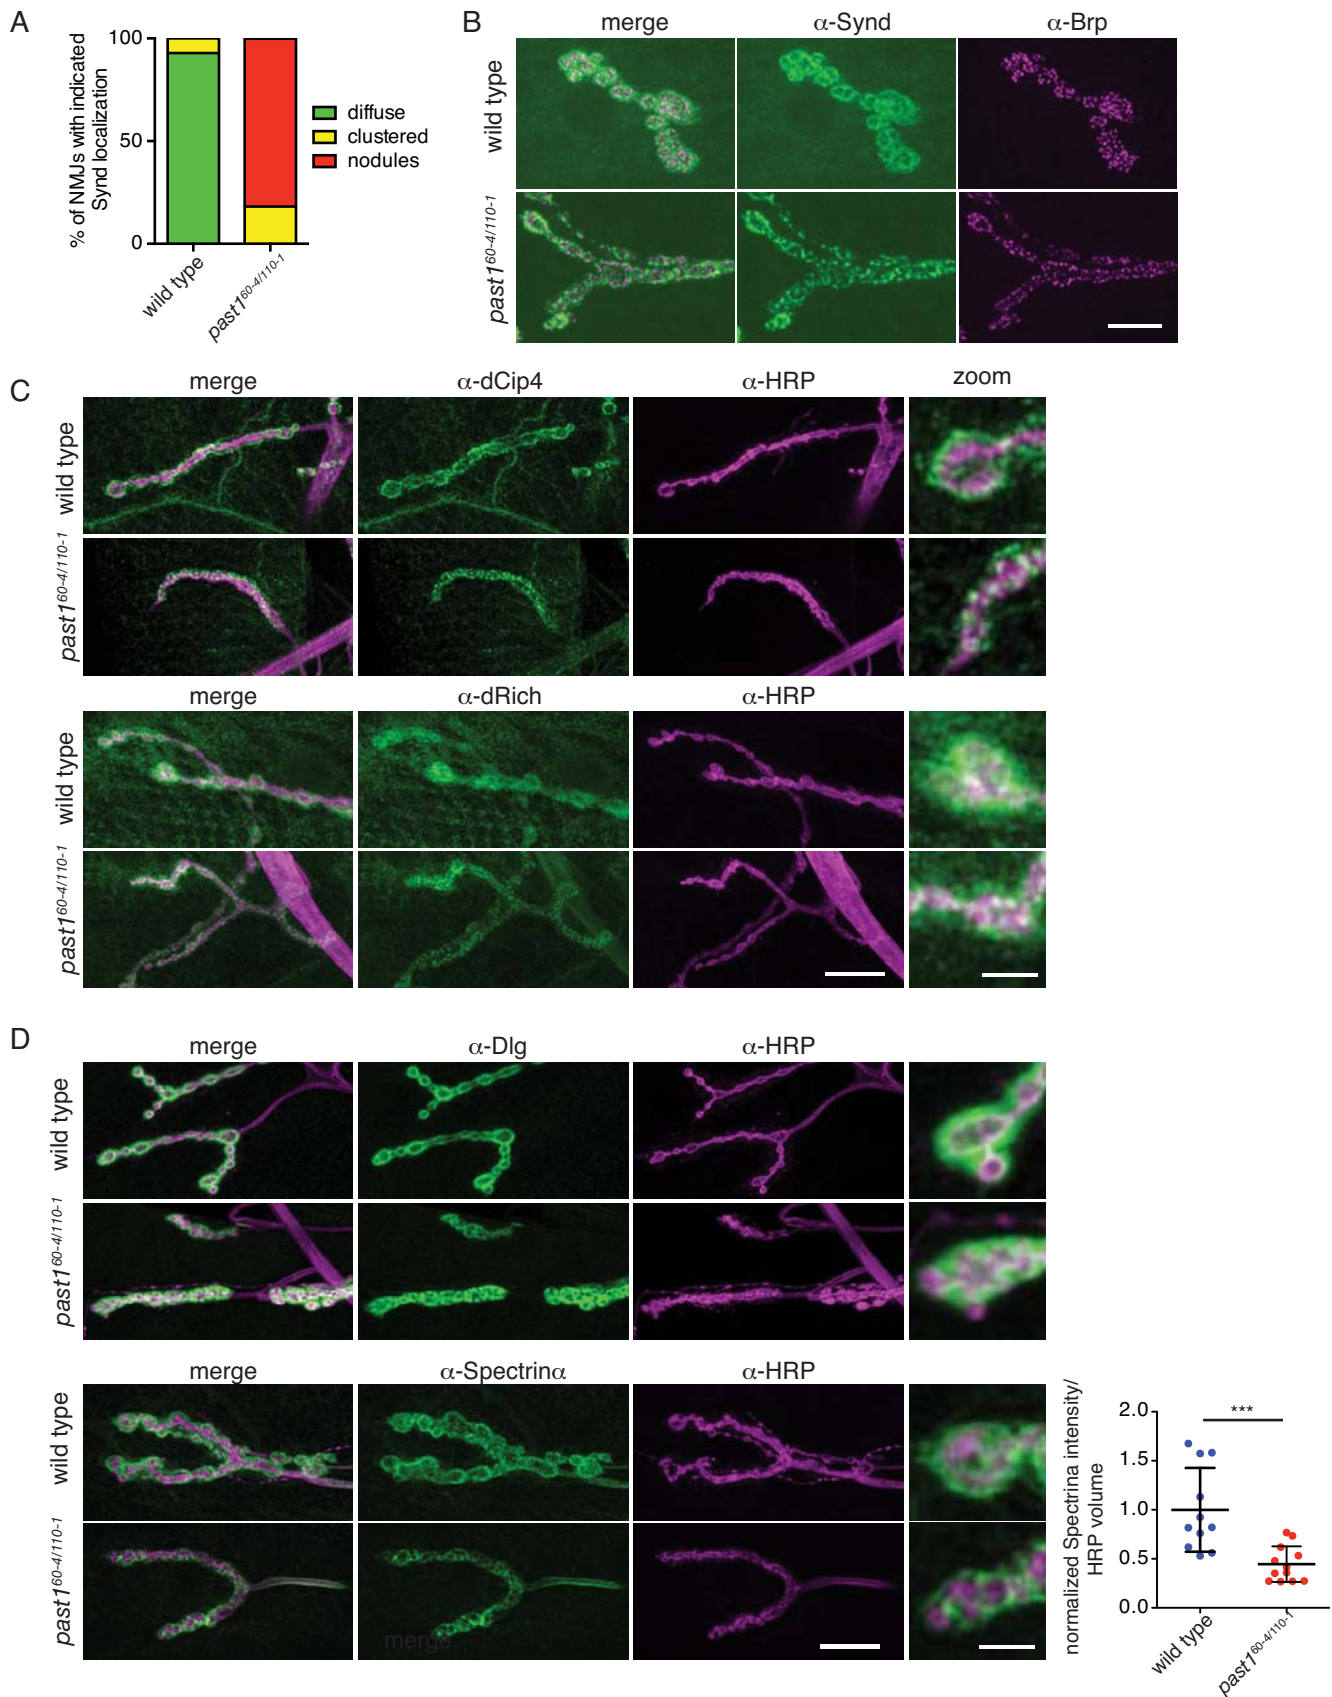

Koles et al. Fig. S4

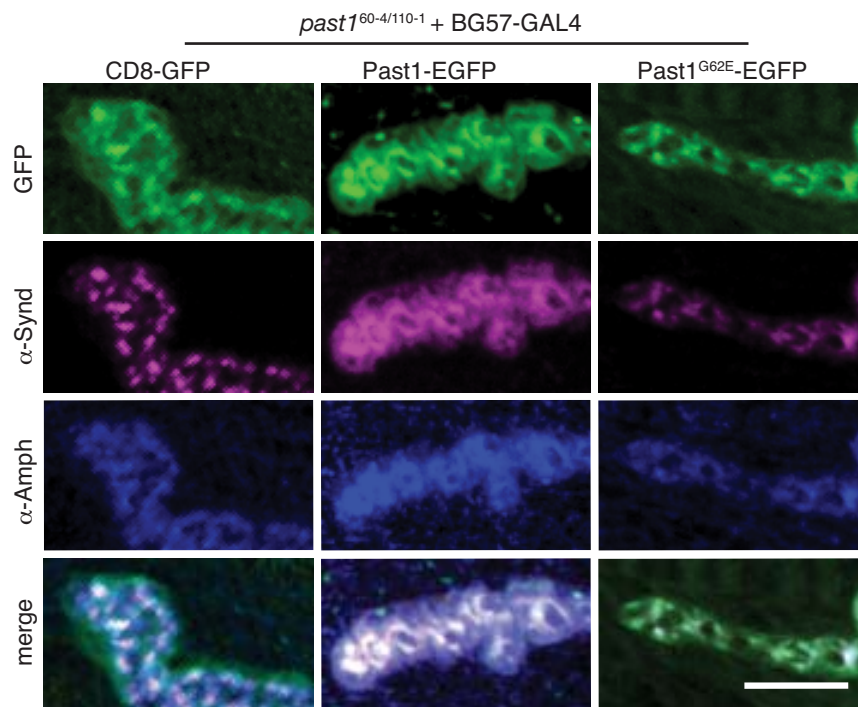

Table S1

| Segment A3, muscle 4                              |                      |                                    |
|---------------------------------------------------|----------------------|------------------------------------|
|                                                   | <i>w</i> (wild type) | <i>past1</i> <sup>60-4/110-1</sup> |
| Number of NMJs                                    | 24                   | 23                                 |
| Mean bouton number (s.e.m.)                       | 57.2 (3.8)           | 39.6 (3.9)                         |
| p value vs wild-type (t-test)                     |                      | 0.0022                             |
| Mean muscle area (1000 $\mu\text{m}^2$ ) (s.e.m.) | 52.8 (2.8)           | 46.3 (2.1)                         |
| p value vs wild-type (t-test)                     |                      | 0.07                               |
| Segment A3, muscle 6/7                            |                      |                                    |
|                                                   | <i>w</i> (wild type) | <i>past1</i> <sup>60-4/110-1</sup> |
| Number of NMJs                                    | 24                   | 20                                 |
| Mean bouton number (s.e.m.)                       | 87.2 (6.0)           | 66.8 (5.1)                         |
| p value vs wild-type (t-test)                     |                      | 0.0147                             |
| Mean muscle area (1000 $\mu\text{m}^2$ ) (s.e.m.) | 78.1 (2.7)           | 66.8 (3.1)                         |
| p value vs wild-type (t-test)                     |                      | 0.0082                             |

## SUPPLEMENTARY LEGENDS

**Figure S1.** (A) Localization of endogenous Past1 and Past1-EGFP to the muscle cortex and muscle-muscle attachment sites, but not to t-tubules. Larvae expressing Past1-EGFP (green) under the control of the BG487-GAL4 muscle driver (which has highest expression in the most anterior segments) were stained with  $\alpha$ -Dlg antibodies (magenta). Left image shows a single 60x spinning disk confocal slices of segment A3 and A4, muscles 6 and 7, optically sectioned at an angle through the muscle to demonstrate cortex, t-tubules, and muscle junctions. Right images show enlarged views of each structure. Scale bars are 20  $\mu$ m (left) or 5  $\mu$ m (right). (B) Presynaptic expression (*elav*<sup>C155</sup>-GAL4) of Past1-EGFP induces extrasynaptic membrane tubules. Images show 2D projections of 100X spinning disk confocal stacks of NMJs on muscles 12 and 13 from *elav*<sup>C155</sup>; +; UAS-Past1-EGFP/+ larvae, labeled with Past1-EGFP (green) and the indicated antibodies (magenta). Extrasynaptic tubules do not contain Futsch, Csp, or Brp, but do contain  $\alpha$ -HRP-positive presynaptic membrane and some Dlg (arrows). Scale bars are 10  $\mu$ m.

**Figure S2. Past1, Amph and Synd co-localization in heterologous cells.** Expression of Past1-EGFP, Synd-mCherry, and Amph-A in S2 cells spread on Concanavalin A. Images show single 100X confocal slices  $\sim$ 1  $\mu$ m from the cell-coverslip interface from representative cells. Scale bars in large images are 10  $\mu$ m; scale bar in magnified views to the left of large images (representing area in dashed rectangle) is 2  $\mu$ m.

**Figure S3. Postsynaptic organization in *past1* mutant NMJS.** (A) Blind quantification of Synd localization from maximum intensity projections of NMJs, in wild type (n=14) and *past1* mutants (n=11). (B) Synd nodules in *past1* mutants do not co-localize with active zones. Images show maximum intensity projections of 100X confocal stacks from representative muscle 4 NMJs labeled with the indicated antibodies. Scale bar is 10  $\mu$ m. (B) dCip4 and dRich localize to nodules in *past1* mutants. Images show maximum intensity projections of 60X confocal stacks from representative muscle 4 NMJs labeled with the indicated antibodies. Scale bar is 20  $\mu$ m in large images and 5  $\mu$ m in magnified images. (C) Dlg and spectrin are misorganized in *past1* mutants, and spectrin levels are reduced. Scale bar is 20  $\mu$ m.

**Figure S4. Past1 ATP-binding is required to rescue Synd nodule formation.** (A) Rescue of Synd nodules by muscle (BG57-GAL4) re-expression of Past1-EGFP but not mCD8-GFP or Past1<sup>G62E</sup>-EGFP. Images show maximum intensity projections of 60X confocal stacks from a representative muscle 4 NMJs labeled with the indicated antibodies. mCD8-GFP is expressed more highly than Past1-EGFP and is therefore shown at a lower intensity to visualize localization. Scale bar is 10  $\mu$ m.

**Table S1.** Bouton number and muscle area measurements for wild type and *past1* mutants.
